# Supplementary material for: Controllable selenium vacancy engineering in basal planes of mechanically exfoliated WSe2monolayer nanosheets for efficient electrocatalytic hydrogen evolution
Source: Royal Society of Chemistry journal article supplement (doi:10.1039/c6cc07832j), 2016-01-01
Supplement: c6cc07832j1.pdf [file c6cc07832j1.pdf]

## **Electronic Supplementary Information (ESI)**

### **Controllable Selenium Vacancy Engineering in Basal Planes of WSe<sub>2</sub> Mechanically Exfoliated Monolayer Nanosheets for Efficient Electrocatalytic Hydrogen Evolution**

Ying Sun, Xuewei Zhang, Baoguang Mao and Minhua Cao\*

Key Laboratory of Cluster Science, Ministry of Education of China, Beijing Key  
Laboratory of Photoelectronic/Electrophotonic Conversion Materials, School of  
Chemistry and Chemical Engineering, Beijing Institute of Technology, Beijing  
100081, P. R. China. E-mail: [caomh@bit.edu.cn](mailto:caomh@bit.edu.cn)

## **1. Experimental Section**

### **1.1 Preparation of WSe<sub>2</sub> MLNSs**

Typically, 1 g of commercial WSe<sub>2</sub> powder was first dispersed in 10 mL of N-methyl-2-pyrrolidone (NMP) in a mortar. After grinding for 30 min, the resultant dispersion was added into 90 mL of NMP in serum bottle and kept sonication for 10 h to exfoliate WSe<sub>2</sub> powder by sonicator (KQ5200DB) with an output power of 200 W. Then the top 2/3 of the dispersion was decanted into flask and kept vigorous stirring for 12 h at 150 °C. Afterwards, the resulting suspension was centrifuged for 20 min at 9000 rpm to separate the centrifugate and supernatant. Then the ethanol was added into the centrifugate and the resulting suspension was centrifuged for 5 min at 3000 rpm. The resultant supernatant was dried by vacuum freeze dryer and finally WSe<sub>2</sub> MLNSs were collected. Note that the sonication and the heating reflux of WSe<sub>2</sub> should be operated in an Ar gas atmosphere to avoid its oxidation. Subsequently, the WSe<sub>2</sub> MLNSs were annealed in an Ar/H<sub>2</sub> atmosphere (Ar: H<sub>2</sub> = 95: 5, in volume) at 700 °C and 900 °C for 90 min at a heating rate of 20 °C min<sup>-1</sup> to obtain WSe<sub>2</sub> MLNSs-700 and WSe<sub>2</sub> MLNSs-900.

### **1.2 Structural characterizations**

The composition and purity of the final samples were characterized using powder X-ray diffraction (XRD) with Cu K $\alpha$  ( $\lambda = 1.54178 \text{ \AA}$ ) incident radiation (Shimadzu XRD-6000). The corresponding scanning range and step were recorded from 10 to 80° (2 $\theta$ ) and 10 ° min<sup>-1</sup>, respectively. The morphology of the resulting samples was investigated by transmission electron microscopy (TEM) (H-8100, with the accelerating voltage of 200 kV), field emission scanning electron microscopy (FE-SEM) (Hitachi S-4800), and atomic force microscopic (AFM) (Tapping-mode AFM, Agilent SPM 5500). Raman spectra were collected on an Invia Raman spectrometer, using an excitation laser of 514.5 nm. X-ray photoelectron spectra (XPS) were used to characterize the surface composition of the sample by using an ESCALAB 250

spectrometer (Perkin-Elmer). The X-ray absorption near edge structure (XANES) measurements were undertaken at Beamlines 1W1B at Beijing Synchrotron Radiation Facility (BSRF) using transmission and fluorescence modes.

### 1.3 Electrochemical measurements

Electrochemical measurements were performed in a three-electrode system at an electrochemical station (CHI660D). The three-electrode configuration was adopted for polarization and electrolysis measurements, where a Ag/AgCl (KCl saturated) electrode, a graphite rod and a glassy carbon (GC) electrode modified by WSe<sub>2</sub>-based catalyst were used as the reference electrode, the counter electrode and the working electrode, respectively. Linear sweep voltammetry with a scan rate of 10 mV s<sup>-1</sup> was conducted in 0.5 M H<sub>2</sub>SO<sub>4</sub> and 1 M KOH solution. For a Tafel plot, the linear portion is fit to the Tafel equation. Electrochemical impedance spectroscopy (EIS) was performed by applying a sine wave with amplitude of 5 mV over the frequency range from 100 kHz to 0.01 Hz at -0.3 V in 0.5 M H<sub>2</sub>SO<sub>4</sub>. All data have been corrected for a small ohmic drop based on impedance spectroscopy. All the potentials were calibrated to a reversible hydrogen electrode (RHE). The WSe<sub>2</sub>-based electrodes were prepared as follows: (1) 2 mg of WSe<sub>2</sub> was dispersed in 1 mL of ethanol/water mixture (ethanol:water = 4.5: 5.5, in volume) by sonicating for 30 min to form a homogeneous solution; (2) 30 μL portion of the resulting solution was dropcast onto a GC electrode with 3 mm diameter by a microliter syringe and dried at room temperature and the catalyst loading mass on electrode is 0.85 mg/cm<sup>2</sup>. (3) 10 μL of Nafion solution (5 wt.%) was dropcast onto the GC electrode and dried at room temperature. The commercial Pt/C electrode was prepared by the same method with the WSe<sub>2</sub>-based electrodes and the loading mass of the Pt/C catalyst on electrode is also 0.85 mg/cm<sup>2</sup>.

## 2. Theoretical calculation methods

All calculations in this work were performed using Vienna ab initio simulation package (VASP). Electron exchange and correlation were treated using the Perdew-Burke-Ernzerhof (PBE) parametrization of the generalized-gradient approximation. A

plane-wave cutoff of 500 eV was used, and a Monkhorst-Pack 4×4×1-point grid was used to sample the Brillouin zone, i.e. 4 k-points in the x and y-direction, and 1 k-points in the z-direction, respectively. Periodic boundary conditions were used in all directions and 11 Å of vacuum was used in the z-direction to separate the slabs, which are 4 Se atoms × 4 W atoms in size. The hydrogen adsorption free energies were determined in the same way as in previous studies. For the structural relaxations, the convergence criteria of 0.02 eV Å<sup>-1</sup> were used for the maximum force.

**The calculation of hydrogen adsorption free energy:** The hydrogen adsorption free energies,  $\Delta G_{\text{H}}$ , were determined in the same way as in previous studies.<sup>[1-3]</sup> The adsorption energy is defined as:

$$\Delta E_{\text{H}} = E(\text{WSe}_2 + \text{H}) - E(\text{WSe}_2) - 1/2 E(\text{H}_2) \quad (1)$$

where (WSe<sub>2</sub>+H) refers to hydrogen adsorbed on the WSe<sub>2</sub> surface, (WSe<sub>2</sub>) refers to a clean WSe<sub>2</sub> surface, and H<sub>2</sub> refers to gas phase hydrogen molecule. The hydrogen adsorption free energy was calculated at zero potential and pH = 0 as:

$$\Delta G_{\text{H}} = \Delta E_{\text{H}} + \Delta E_{\text{ZPE}} - T\Delta S \quad (2)$$

where  $\Delta E_{\text{H}}$  is the hydrogen adsorption energy,  $\Delta E_{\text{ZPE}}$  is the difference in zero point energy,  $T$  is the temperature (300 K) and  $\Delta S$  is the difference in entropy between H that is adsorbed and in the gas phase, at 101325 Pa. A normal mode analysis was used to determine the vibrational frequencies of the adsorbed species, which were used to determine the zero point energy correction and the entropy. The adsorption is too strong if  $\Delta G_{\text{H}}$  is very negative or too weak if  $\Delta G_{\text{H}}$  is very positive.

### 3. Figures and captions

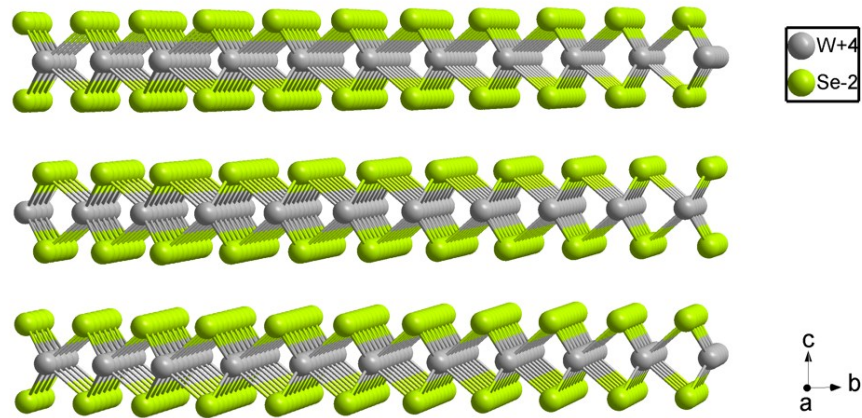

**Fig. S1** The crystal structure of WSe<sub>2</sub>.

WSe<sub>2</sub> has a lamellar structure, in which the individual Se-W-Se layers weakly interact with each other by Van der Waals force.

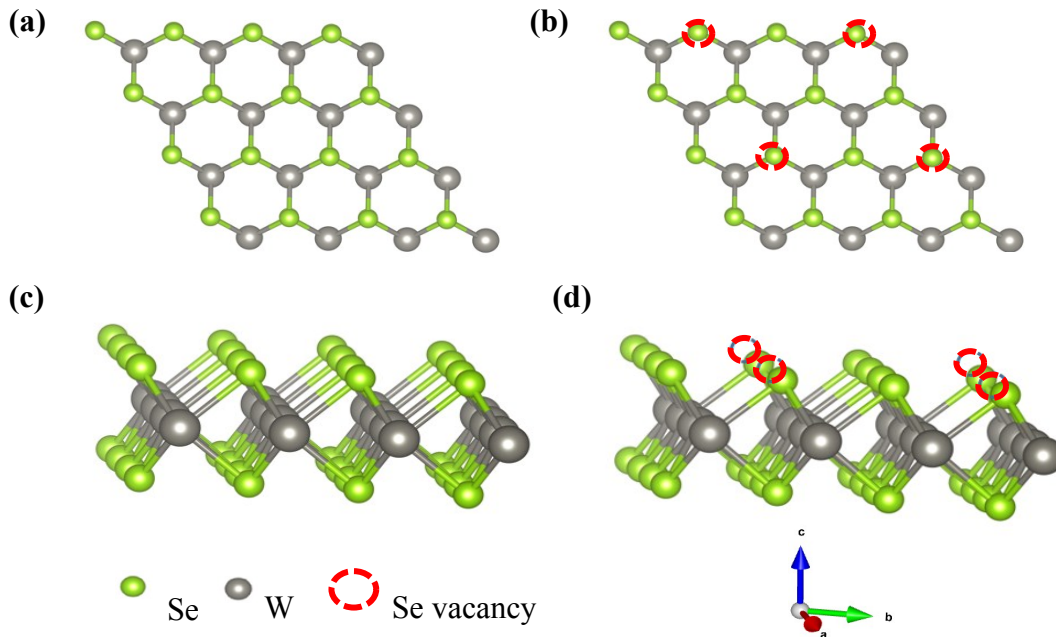

**Fig. S2** Computational unit cell of  $\text{WSe}_2$ . Top view (upper panel) of the atomic structures of the  $\text{WSe}_2$  basal plane with 0% (a) and 12.5% Se-vacancies (b). Side view (lower panel) of the atomic structures of the  $\text{WSe}_2$  basal plane with 0% (c) and 12.5% Se-vacancies (d).

Each unit cell consists of 16 W atoms and 32 Se atoms on the surface. Assuming that Se-vacancies are only formed on the surface (top side of the monolayer), in this unit cell size, the concentration of Se-vacancies with the increment of 3.12% is possible, where the 3.12% is defined as the total number of the Se-vacancies divided by the total number of Se atoms in the pristine basal plane. All subsequent Se-vacancies from the first one were spaced out as far as possible from existing Se-vacancies. For the range of Se-vacancies considered in this work, we observe no noticeable rearrangement in the geometry.

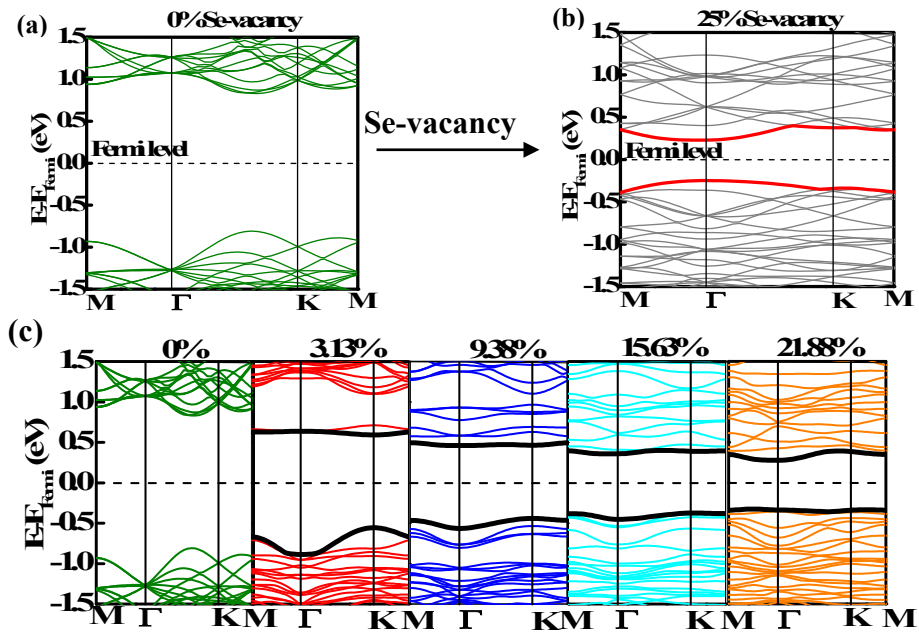

**Fig. S3** Band structure of WSe<sub>2</sub> MLNSs with 0% (a) and 25% Se-vacancies (b). (c) Tuning the band structure by increasing Se-vacancy concentration. The bands nearest to the Fermi level are highlighted in black.

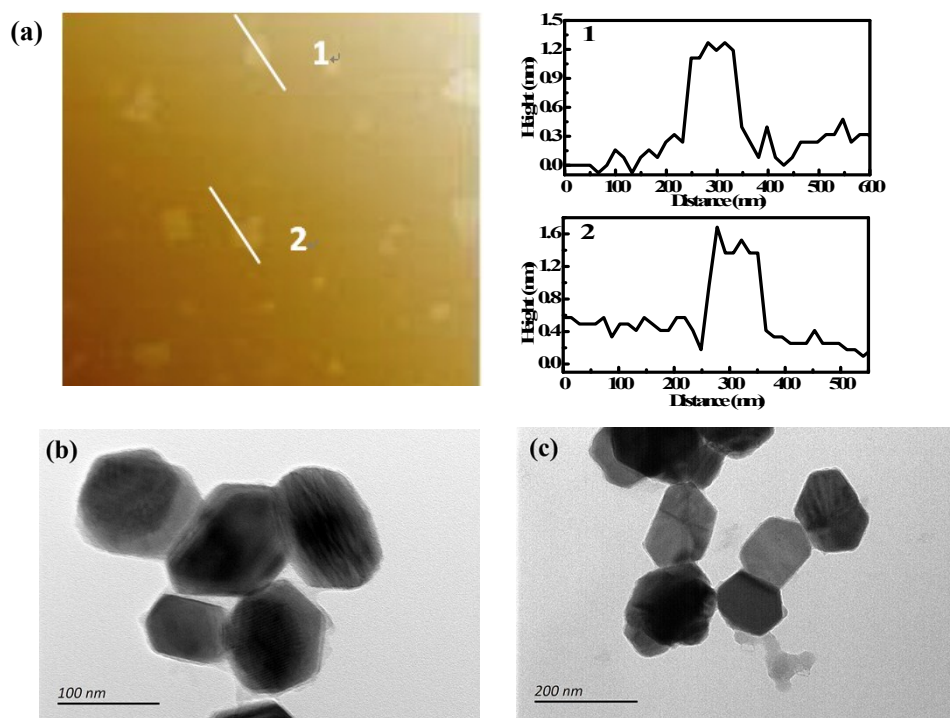

**Fig. S4** (a) AFM image and height profiles of WSe<sub>2</sub> MLNSs. TEM images of WSe<sub>2</sub> MLNSs-700 (b) and WSe<sub>2</sub> MLNSs-900 (c).



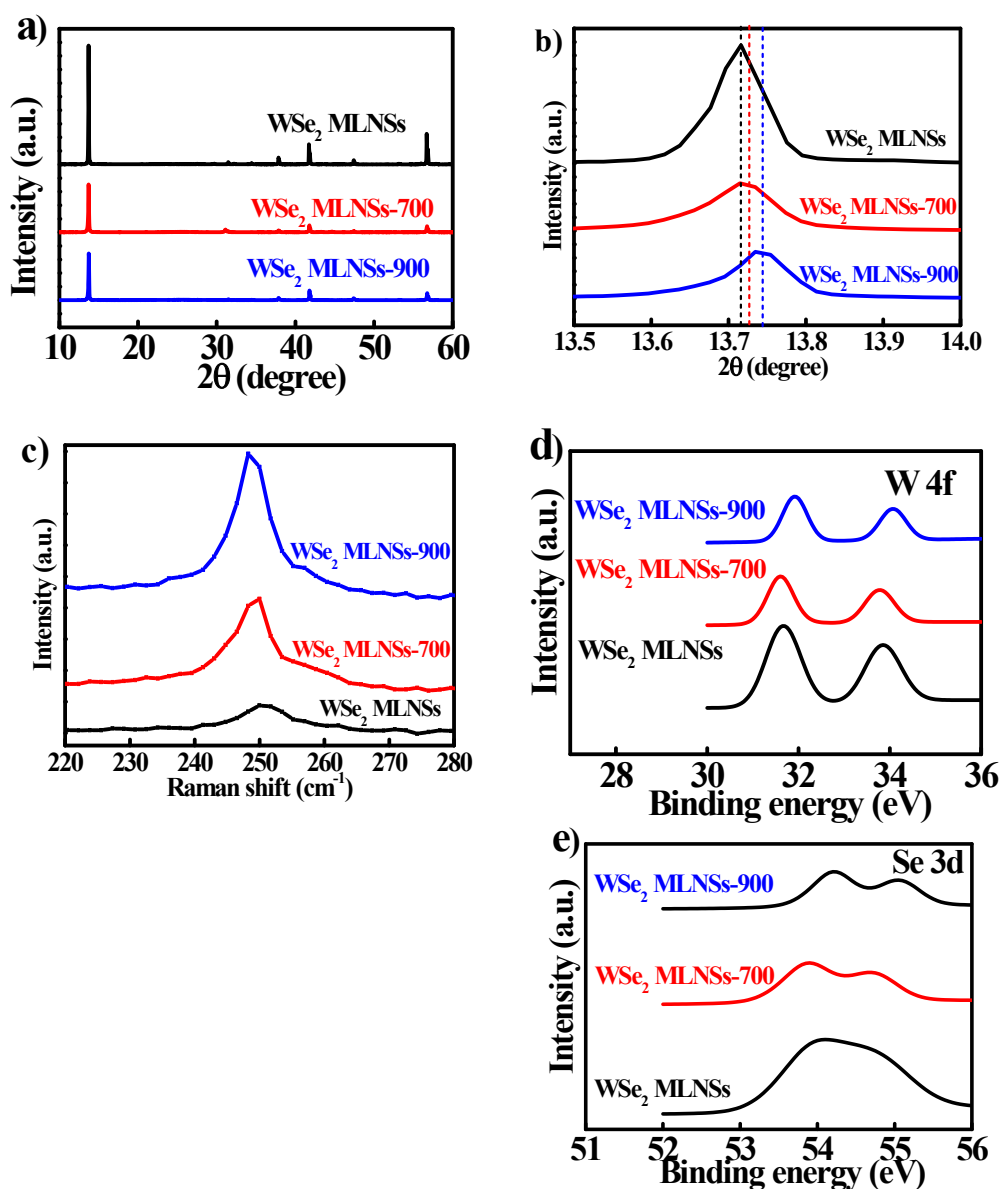

**Fig. S5.** (a) wide-angle and (b) narrow-angle XRD patterns of WSe<sub>2</sub> MLNSs, WSe<sub>2</sub> MLNSs-700 and WSe<sub>2</sub> MLNSs-900. (c) Raman spectra of WSe<sub>2</sub> MLNSs, WSe<sub>2</sub> MLNSs-700 and WSe<sub>2</sub> MLNSs-900. High-resolution XPS spectra of W 4f (d) and Se 3d (e) of WSe<sub>2</sub> MLNSs, WSe<sub>2</sub> MLNSs-700 and WSe<sub>2</sub> MLNSs-900.

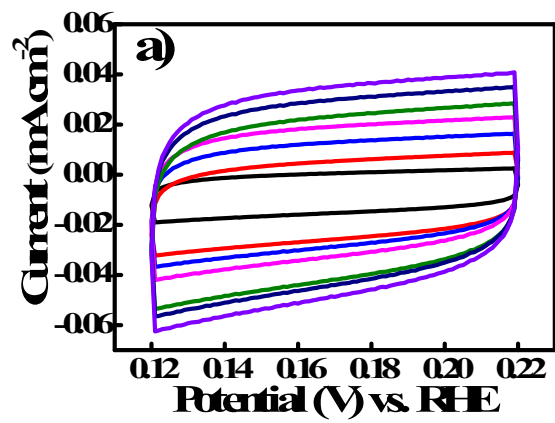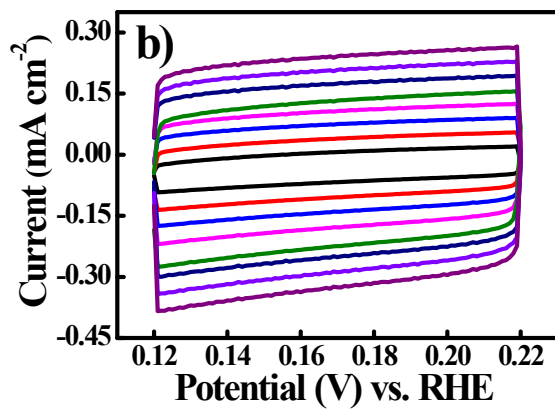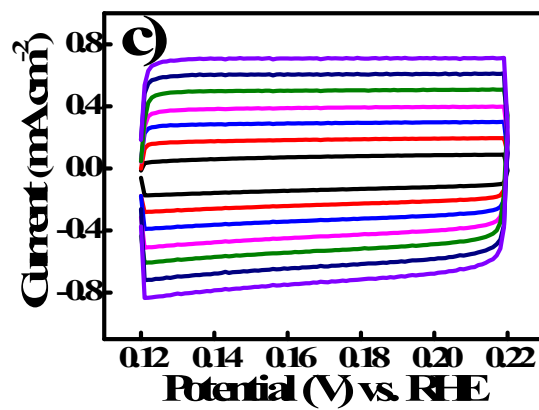

**Fig. S6** Cyclic voltammograms of (a) WSe<sub>2</sub> MLNSs, (b) WSe<sub>2</sub> MLNSs-700 and (c) WSe<sub>2</sub> MLNSs-900 electrodes at various scan rates (20-140 mV s<sup>-1</sup>).

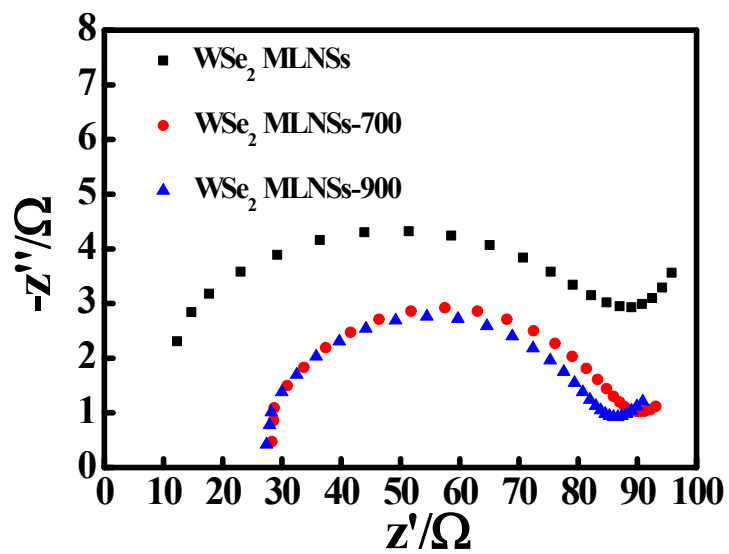

**Fig. S7** ESI spectra of WSe<sub>2</sub> MLNSs, WSe<sub>2</sub> MLNSs-700 and WSe<sub>2</sub> MLNSs-900.

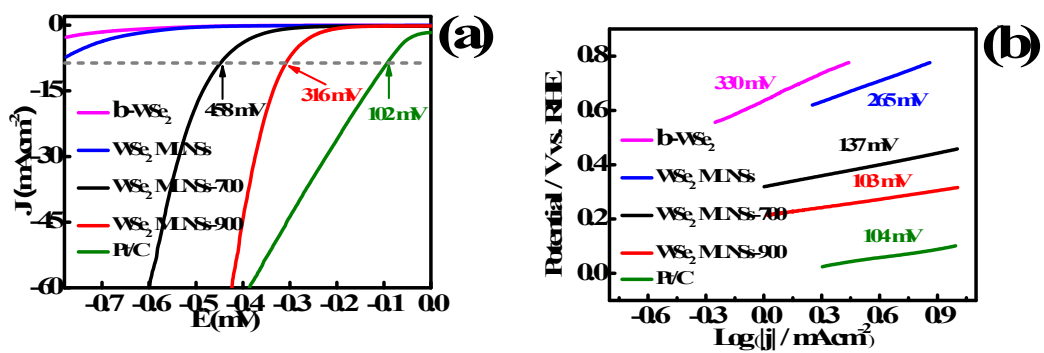

**Fig. S8** (a) HER polarization plots of all samples in 1.0 M KOH. (b) Tafel plots obtained from the polarization curves in (a).

**Table S1.** The composition of the samples estimated from the XPS measurements.

| Sample                  | WSe <sub>2</sub> MLNSs | WSe <sub>2</sub> MLNSs-700 | WSe <sub>2</sub> MLNSs-900 |
|-------------------------|------------------------|----------------------------|----------------------------|
| x in WSe <sub>2-x</sub> | 0                      | 0.1                        | 0.13                       |

**Table S2.** Structural parameters around W atoms extracted from XAFS curve-fitting for WSe<sub>2</sub> MLNSs, WSe<sub>2</sub> MLNSs-700 and WSe<sub>2</sub> MLNSs-900, respectively.

| Sample                     | Path | R (Å) | N    | $\sigma^2$ ( $10^{-3}$ Å <sup>2</sup> ) | $\Delta E_0$ (eV) |
|----------------------------|------|-------|------|-----------------------------------------|-------------------|
| WSe <sub>2</sub> MLNSs     | W-Se | 2.529 | 6.00 | 2.469                                   | 7.7               |
| WSe <sub>2</sub> MLNSs-700 | W-Se | 2.528 | 5.50 | 2.503                                   | 7.6               |
| WSe <sub>2</sub> MLNSs-900 | W-Se | 2.527 | 5.40 | 2.552                                   | 7.7               |

**Table S3.** Electrocatalytic performance of the three different catalysts.

| Catalyst                   | Onset potential (mV) | $\eta$ @ j=10 mA/cm <sup>2</sup> (mV) | Tafel slope(mV/decade) | C <sub>dl</sub> (mF/cm <sup>2</sup> ) | j <sub>0</sub> ( $\times 10^{-6}$ A/cm <sup>2</sup> ) |
|----------------------------|----------------------|---------------------------------------|------------------------|---------------------------------------|-------------------------------------------------------|
| WSe <sub>2</sub> MLNSs     | 200                  | 563                                   | 95                     | 0.56                                  | 0.38                                                  |
| WSe <sub>2</sub> MLNSs-700 | 151                  | 318                                   | 90                     | 3.53                                  | 3.17                                                  |
| WSe <sub>2</sub> MLNSs-900 | 125                  | 245                                   | 76                     | 10.21                                 | 6.14                                                  |

**Table S4.** The onset overpotential, overpotential at 10 mA cm<sup>-2</sup> and Tafel slope of various electrocatalysts for HER.

| Catalysts                                           | Onset overpotential (mV) | Overpotential at 10 mA cm <sup>-2</sup> (mV) | Tafel slope (mV/decade) | Refs.     |
|-----------------------------------------------------|--------------------------|----------------------------------------------|-------------------------|-----------|
| WS <sub>2(1-x)</sub> Se <sub>2x</sub> NTs on CFP    | —                        | ~300                                         | 105                     | 1b        |
| MoSe <sub>2-x</sub> NSs                             | 170                      | ~290                                         | 98                      | 2a        |
| 1T-MoS <sub>2</sub> NSs                             | 100                      | ~220                                         | 40                      | 3c        |
| WSe <sub>2</sub> nanofilm on CFP                    | —                        | 300                                          | 77                      | 4b        |
| WS <sub>2</sub> QDs anchored in WS <sub>2</sub> NSs | 180                      | ~350                                         | 75                      | 7a        |
| MoS <sub>2</sub> QDs                                | 160                      | ~320                                         | 58                      | 10        |
| WSe <sub>2</sub> MLNSs-900                          | 125                      | 245                                          | 76                      | This work |

NTs: nanotubes; CFP: carbon fiber paper; NSs: nanosheets; QDs: quantum dots.

## References

- 1 H. Li, C. Tsai, A. L. Koh, L. L. Cai, A. W. Contryman, A. H. Fragapane, J. H. Zhao, H. S. Han, H. C. Manoharan, F. Abild-Pedersen, J. K. Nørskov, X. L. Zheng, *Nat. Mater.*, 2016, **15**, 48.
- 2 C. Tsai, K. Chan, F. Abild-Pedersen, J. K. Nørskov, *Phys. Chem. Chem. Phys.*, 2014, **16**, 13156.
- 3 C. Tsai, K. Chan, J. K. Nørskov, F. Abild-Pedersen, *Surf. Sci.*, 2015, **640**, 133.
